# Supplementary material for: FtmOx1, a non-heme Fe(ii) and α-ketoglutarate-dependent dioxygenase, catalyses the endoperoxide formation of verruculogen in Aspergillus fumigatus
Source: Royal Society of Chemistry journal article supplement (doi:10.1039/b908392h), 2009-01-01
Supplement: b908392h.pdf [file b908392h.pdf]

## **Experimental section**

### **Strains, plasmids and culture conditions**

*Escherichia coli* XL1 Blue MRF' (Agilent Technologies, Waldbronn, Germany) was used for cloning and expression experiments and grown in liquid or on solid Luria Bertani medium [1] at 37 °C. Carbenicillin (50 µg/ml) was used for selection of recombinant *E. coli* strains. pGEM-T and pQE9 were obtained from Promega (Mannheim, Germany) and Qiagen (Hilden, Germany), respectively.

BAC AfB8B11, containing the fumitremorgin/verruculogen cluster of *A. fumigatus* Af293, was kindly provided by David Harris from the Wellcome Trust Sanger Institute (Cambridge, UK) and used as genomic DNA for PCR amplification.

### **Chemicals**

Fumitremorgin B was obtained by conversion of 12, 13-dihydroxyfumitremorgin C by using FtmPT2 as described in a previous study.[2] Verruculogen was purchased from Alexis Biochemicals (Lörrach, Germany). <sup>18</sup>O<sub>2</sub> (99 %) was obtained from icon services Inc. (Summit, NY, USA) and succinate kit was from megazyme (Wicklow, Ireland).

### **Cloning of *ftmOx1***

For construction of the expression construct pAG025, *ftmOx1* (AfuA\_8G00230) was amplified by PCR from genomic DNA on BAC AfB8B11 by using the primers *ftmOx1\_for* (TT**GGATCC**ATGACCGTCGAC) and *ftmOx1\_rev* (GA**AAGCTT**CTAAGCCGGCGA). The bold letters represent mutations instead of the original sequence to give the underlined restriction sites BamHI and HindIII, respectively. The PCR fragment was ligated into pGEM-T to give pAG020. The resulting plasmid was sequenced by MWG (Martinsried, Germany) to confirm the sequence integrity. *ftmOX1* was then released from pAG020 with

BamHI and HindIII and ligated into pQE9 to give pAG024. In order to have the possibility to remove the His-tag, a thrombin cleavage site was inserted as following to give the expression plasmid pAG025: Two oligo nucleotides ThrombinBam\_for (GATCTGGTTCCGCGTGGTTCC) and ThrombinBam\_rev (ACCAAGGCGCACCAAGGCTAG), encoding a thrombin-cleavage site, were ligated into pAG024, which had been restricted by BamHI previously.

### **Expression of *ftmOx1* and purification of the gene product**

For gene expression, *E. coli* cells harbouring the expression plasmid pAG025 were cultivated in 300 ml Erlenmeyer flasks containing 100 ml liquid medium and grown for 4 h at 200 rpm. For induction, IPTG (1 mM) was added and the bacteria were cultivated for further 16 hours before harvest. The cell pellet was resuspended in 2 ml lysis buffer (10 mM imidazole, 50 mM NaH<sub>2</sub>PO<sub>4</sub>, 300 mM NaCl, pH 8.0). After addition of 1 mg/ml lysozyme and incubation on ice for 30 minutes, the cells were sonicated six times for 10 s at 200 W. To separate the cellular debris from the soluble protein, the lysate was centrifugated 30 min at 14 000 x g, 4 °C. One-step purification was carried out according to the manufacturer's instruction by affinity chromatography with Ni-NTA agarose resin (Qiagen, Hilden, Germany). The protein was eluted with imidazole (250 mM). To exchange the buffer, the protein fractions were passed through a NAP-5 column (GE Healthcare, Munich, Germany), which had been equilibrated with Tris-HCl (50 mM, pH 7.5) containing 15 % glycerol.

For removal of metal ions from recombinant protein, FtmOx1 was stirred on ice in the presence of 1 mM EDTA for 1 hr and then passed twice through a NAP-5 column, which had been equilibrated with Tris-HCl (50 mM, pH 7.5) containing 15 % glycerol. The protein was stored at -20 °C until use.

## **Protein analysis**

Standard protein techniques were used as described elsewhere.<sup>[3;4]</sup> The subunits of FtmOx1 were analysed by SDS-PAGE, carried out according to the method of Laemmli<sup>[4]</sup>, and protein bands were stained with Coomassie brilliant blue R-250. The native molecular mass of active recombinant FtmOx1 was determined by gel filtration on a HiLoad 16/60 Sephadex<sup>TM</sup> 200 column that had been equilibrated with Tris-HCl (20 mM, pH 7.5) containing NaCl (200 mM). The column was calibrated with conalbumin (75 kDa), ovalbumin (43 kDa), carboanhydrase (29 kDa), ribonuclease A (13.7 kDa) and aprotinin (6.5 kDa). The proteins were eluted with the same buffer as used for column equilibration.

## **Assay for FtmOx1 activity**

The standard reaction mixture (100  $\mu$ l) contained Tris-HCl (50 mM, pH 7.5), FtmOx1 (110  $\mu$ M), fumitremorgin B (0.5mM) or degradation product, ascorbate (1 mM),  $\alpha$ -ketoglutarate (1 mM), catalase (160 U). For investigation of the dependency of enzymatic activity on metal ions, Ca(II), Co(II), Cu(II), Fe(II), Mg(II), Mn(II) or Zn(II) at a final concentration of 1 mM were added to the reaction mixture containing FtmOx1 after treatment with EDTA.

After incubation for 16 hours at 37 °C, the enzymatic reaction was stopped by addition of 100  $\mu$ l methanol, the precipitated protein was removed by centrifugation at 13 000 x g for 10 minutes and the supernatant was subjected to HPLC analysis.

## **Assay in the presence of <sup>18</sup>O<sub>2</sub> enriched atmosphere**

For enzymatic reaction in the presence of <sup>18</sup>O<sub>2</sub>, FtmOx1 assay (500  $\mu$ l) contained same components as in the standard reaction mixture. <sup>16</sup>O<sub>2</sub> in the reaction mixture was partially removed by application of vacuum followed by flushing with argon for three times. The argon was then removed by vacuum and finally <sup>18</sup>O<sub>2</sub> was allowed to enter the flask. After

incubation for 16 hours, the reaction was stopped by addition of 500 µl methanol and subjected to LC-MS analysis.

### **Assay for succinate formation**

Succinate was detected in analogy to that of TauD <sup>[5]</sup> by using a test kit from Megazyme, Ireland, according to the manufacturer's instructions. The assays were carried out in a volume of 2 ml at 25 °C and succinate formation was followed with a photometer at 340 nm for 12 hours.

### **HPLC analysis**

Enzymatic products were analysed on a HPLC by using a Multosphere 120 RP-18 column (250 mm x 4 mm, 5 µm; C&S Chromatographie; Langerwehe, Germany). A linear gradient of 35 – 70 % (v/v) acetonitrile in water was run for 15 minutes, followed by 100 % (v/v) acetonitrile for 5 minutes. Before the next injection, the column was equilibrated with 35 % (v/v) acetonitrile for 5 minutes. The substances were detected with a Photo Diode Array detector and illustrated at 296 nm.

### **LC-MS-analysis**

For identification of verruculogen as enzymatic product, the assays were analysed by positive and negative electrospray ionization (ESI) mass spectrometry with a ThermoFinnigan TSQ Quantum. The mass spectrometer was coupled with an Agilent HPLC series 1100 equipped with a RP18-column (2 x 250 mm, 5 µm). For separation, the column was run with 10 % (v/v) solvent B (CH<sub>3</sub>OH) in solvent A (H<sub>2</sub>O, each containing 0.1 % (v/v) HCOOH) for 5 min, followed by a gradient from 10 % to 100 % (v/v) B over 30 min. After washing with 100 % (v/v) B, the column was equilibrated with 10 % (v/v) B for 10 min. The flow rate was at 0.2 ml min<sup>-1</sup>.

For detection of  $^{18}\text{O}$ -verruculogen, the assays were analysed by secondary ion mass (SIM) spectrometry with an Acquity UPLC BEH C18-column (2.1 x 50 mm, 1.7  $\mu\text{m}$ ). For separation, the column was run with 5% (v/v) solvent B (acetonitrile) in solvent A ( $\text{H}_2\text{O}$ , each containing 0.1 % (v/v)  $\text{HCOOH}$ ) for 1 min, followed by a gradient from 5 % to 95 % (v/v) B over 9 min. Afterwards the column was washed with 95 % (v/v) B for 1 minute. The flow rate was at 0.6 ml  $\text{min}^{-1}$ .

|                                              |                                                                                                                                          |            |
|----------------------------------------------|------------------------------------------------------------------------------------------------------------------------------------------|------------|
| Q9HGD7, Fum3p <i>G. moniliformis</i>         | -SASTIH-----VGPGQKPQ--TL <b>HRDL</b> -----GSYPIF                                                                                         | 155        |
| Q9APV4 <i>P. aeruginosa</i>                  | TTAQLIE-----IGPGNKAQ--ML <b>HRDM</b> -----AQYQPF                                                                                         | 164        |
| Q9KZG7 <i>S. coelicolor</i>                  | VTSQINV-----VNPGGAAQ--TV <b>HRDY</b> -----HLGFLSDR                                                                                       | 187        |
| Q93HE7 <i>S. avermitilis</i>                 | ITSQINV-----VNPGGAAQ--SV <b>HRDY</b> -----HLGLLSNA                                                                                       | 192        |
| <b>EAL85143., FtmOx1 <i>A. fumigatus</i></b> | <b>-AAFLRE-----IESGMPAQ--PF<b>HRDD</b>-----ATHPLM</b>                                                                                    | <b>138</b> |
| Q9APW1 <i>P. aeruginosa</i>                  | LSMTQAIQ-----IGPGQLQ--PL <b>HRDD</b> -----ATSLW                                                                                          | 143        |
| P47181.1 <i>S. cerevisiae</i>                | LNSGIVYK-----VGAGASDQ--GY <b>HRED</b> -----IVHHTTH                                                                                       | 178        |
| P67771.1 <i>M. bovis</i>                     | -PSFPPFS-----TPDVFNQ--AF <b>HQDF</b> -----PRVL                                                                                           | 133        |
| 2A1X A <i>H. sapiens</i>                     | -AMHTML-----INKPPDSGKTSR <b>HPLHQDL</b> -----HYFP                                                                                        | 152        |
|                                              | ★★                                                                                                                                       |            |
| Q9HGD7, Fum3p <i>G. moniliformis</i>         | ----WMLGPQG--PESQIN----FLVATTD <b>FTEANG</b> ATRIIPGSHKW-E                                                                               | 193        |
| Q9APV4 <i>P. aeruginosa</i>                  | ----VAMNKHA--PRTITN----LMLALTD <b>FTEENG</b> ATRLIPGSQDWD                                                                                | 203        |
| Q9KZG7 <i>S. coelicolor</i>                  | AAAAYPAHVHRLSPVLT <b>LQ</b> ----AVAHCDMPV <b>ESGPT</b> MYLPHSQYEP                                                                        | 232        |
| Q93HE7 <i>S. avermitilis</i>                 | VAATYPAHVHRLSPAL <b>TQ</b> ----AVAH <b>CAMPV</b> ESGPTMYLPYSQTYEP                                                                        | 237        |
| <b>EAL85143., FtmOx1 <i>A. fumigatus</i></b> | <b>-----HYQPLEAPPVSL</b> S-----V <b>IFPLTEFTEENG</b> ATEVILGSHRWTE                                                                       | <b>177</b> |
| Q9APW1 <i>P. aeruginosa</i>                  | -----RHPQY <b>G</b> -REAR <b>LQ</b> ----LMLAITD <b>FTEENG</b> ATRVIPGSHQWDD                                                              | 181        |
| P47181.1 <i>S. cerevisiae</i>                | ---QACERFQY-GTET <b>MVG</b> ----LGVAF <b>TD</b> MNKENGSTRMIVGSHLWGP                                                                      | 219        |
| P67771.1 <i>M. bovis</i>                     | -----SGY----IASVN----IMFAID <b>P</b> FRDTGATLVVPGSHQRIE                                                                                  | 167        |
| 2A1X A <i>H. sapiens</i>                     | -----FRPS---DLIVC----AWTAMEHIS <b>R</b> NNGLVVLPGTHKGSL                                                                                  | 187        |
| Q9HGD7, Fum3p <i>G. moniliformis</i>         | FN-----QH <b>GD</b> R-----DMTIPAE <b>M</b> KAG                                                                                           | 211        |
| Q9APV4 <i>P. aeruginosa</i>                  | FD-----DVG <b>T</b> P-----EMTIPALL <b>K</b> AG                                                                                           | 221        |
| Q9KZG7 <i>S. coelicolor</i>                  | GYLAWR---LPEFRAY <b>F</b> E-----AR <b>H</b> VQLPL <b>A</b> KG                                                                            | 258        |
| Q93HE7 <i>S. avermitilis</i>                 | GYLAWR---LPDFQAY <b>F</b> E-----SR <b>H</b> VQLPL <b>A</b> E <b>G</b>                                                                    | 263        |
| <b>EAL85143., FtmOx1 <i>A. fumigatus</i></b> | <b>VG-----TP<b>E</b>R-----DQAVL</b> AT <b>M</b> DP <b>G</b>                                                                              | <b>194</b> |
| Q9APW1 <i>P. aeruginosa</i>                  | E-----RM <b>P</b> TQ-----EETIGA <b>E</b> M <b>K</b> AG                                                                                   | 198        |
| P47181.1 <i>S. cerevisiae</i>                | HD-----SCGN <b>F</b> D-----KRME <b>F</b> HVN <b>V</b> AK <b>G</b>                                                                        | 239        |
| P67771.1 <i>M. bovis</i>                     | KPD-----HTY <b>L</b> AR-----NA <b>V</b> PVQ <b>C</b> A <b>A</b> G                                                                        | 186        |
| 2A1X A <i>H. sapiens</i>                     | KP-----HDY <b>P</b> K <b>W</b> EGG <b>V</b> N <b>K</b> MF <b>H</b> -----GIQDY <b>E</b> EN <b>K</b> AR <b>V</b> HL <b>V</b> ME <b>K</b> G | 223        |
| Q9HGD7, Fum3p <i>G. moniliformis</i>         | DCLLISGKV <b>I</b> HGTGG <b>N</b> KT-----DQ-ER <b>G</b> CL                                                                               | 236        |
| Q9APV4 <i>P. aeruginosa</i>                  | DAVLFGGKV <b>V</b> HGGGAN <b>V</b> T-----AD <b>F</b> YRR <b>G</b> L                                                                      | 247        |
| Q9KZG7 <i>S. coelicolor</i>                  | DAVFFSPAL <b>F</b> HAAG <b>T</b> NRS--AG--IRRMAN <b>L</b> QVSSAFGRAM <b>E</b> TV <b>D</b> REAV                                           | 304        |
| Q93HE7 <i>S. avermitilis</i>                 | DAVFFNPAL <b>F</b> HAAG <b>T</b> NRS--SD--IRRMAN <b>L</b> QVSSAFGRAM <b>E</b> TV <b>D</b> RATV                                           | 309        |
| <b>EAL85143., FtmOx1 <i>A. fumigatus</i></b> | <b>DVLI</b> V <b>R</b> Q <b>R</b> V <b>V</b> HAGGG <b>N</b> RT-----TAG <b>K</b> PR <b>R</b> V <b>V</b>                                   | <b>221</b> |
| Q9APW1 <i>P. aeruginosa</i>                  | TALLWLG <b>S</b> V <b>V</b> HGGGAN <b>R</b> S-----DA-PR <b>T</b> GL                                                                      | 223        |
| P47181.1 <i>S. cerevisiae</i>                | DAVLF <b>L</b> GS <b>L</b> Y <b>H</b> AAS <b>N</b> RT-----SQ-DR <b>V</b> AG                                                              | 264        |
| P67771.1 <i>M. bovis</i>                     | SLF <b>V</b> FD <b>S</b> TL <b>W</b> HAAG <b>R</b> NTS-----G <b>K</b> -DR <b>L</b> AI                                                    | 211        |
| 2A1X A <i>H. sapiens</i>                     | DT <b>V</b> FF <b>H</b> PL <b>L</b> I <b>H</b> GS <b>G</b> Q <b>N</b> KT-----Q <b>G</b> -FR <b>K</b> AI                                  | 248        |
|                                              | ★ ★                                                                                                                                      |            |

**Figure S1: Alignments of FtmOx1 with Fum3p and enzymes of the PhyH superfamily (NCBI blast pfam05721). Amino acids of the binding motif **HXD...H...R** are indicated in bold letters and are labelled with an asterisk. Q9HGD7: hydroxylase from *Gibberella moniliformis* involved in fumonisin biosynthesis; Q9APV4: putative  $\alpha$ -ketoglutarate dependent dioxygenase from *Pseudomonas aeruginosa*, Q9KZG7: putative  $\alpha$ -ketoglutarate dependent dioxygenase from *Streptomyces coelicolor*, Q93HE7: putative  $\alpha$ -ketoglutarate dependent hydroxylase from *Streptomyces avermitilis*, FtmOx1:  $\alpha$ -ketoglutarate dependent endoperoxidase from *Aspergillus fumigatus*, P47181.1: putative Phytanoyl-CoA dioxygenase from *Saccharomyces cerevisiae*, P67771.1: putative Phytanoyl-CoA dioxygenase from *Mycobacterium bovis*, 2A1X|A: phytanoyl-CoA-2-hydroxylase from *Homo sapiens*.**

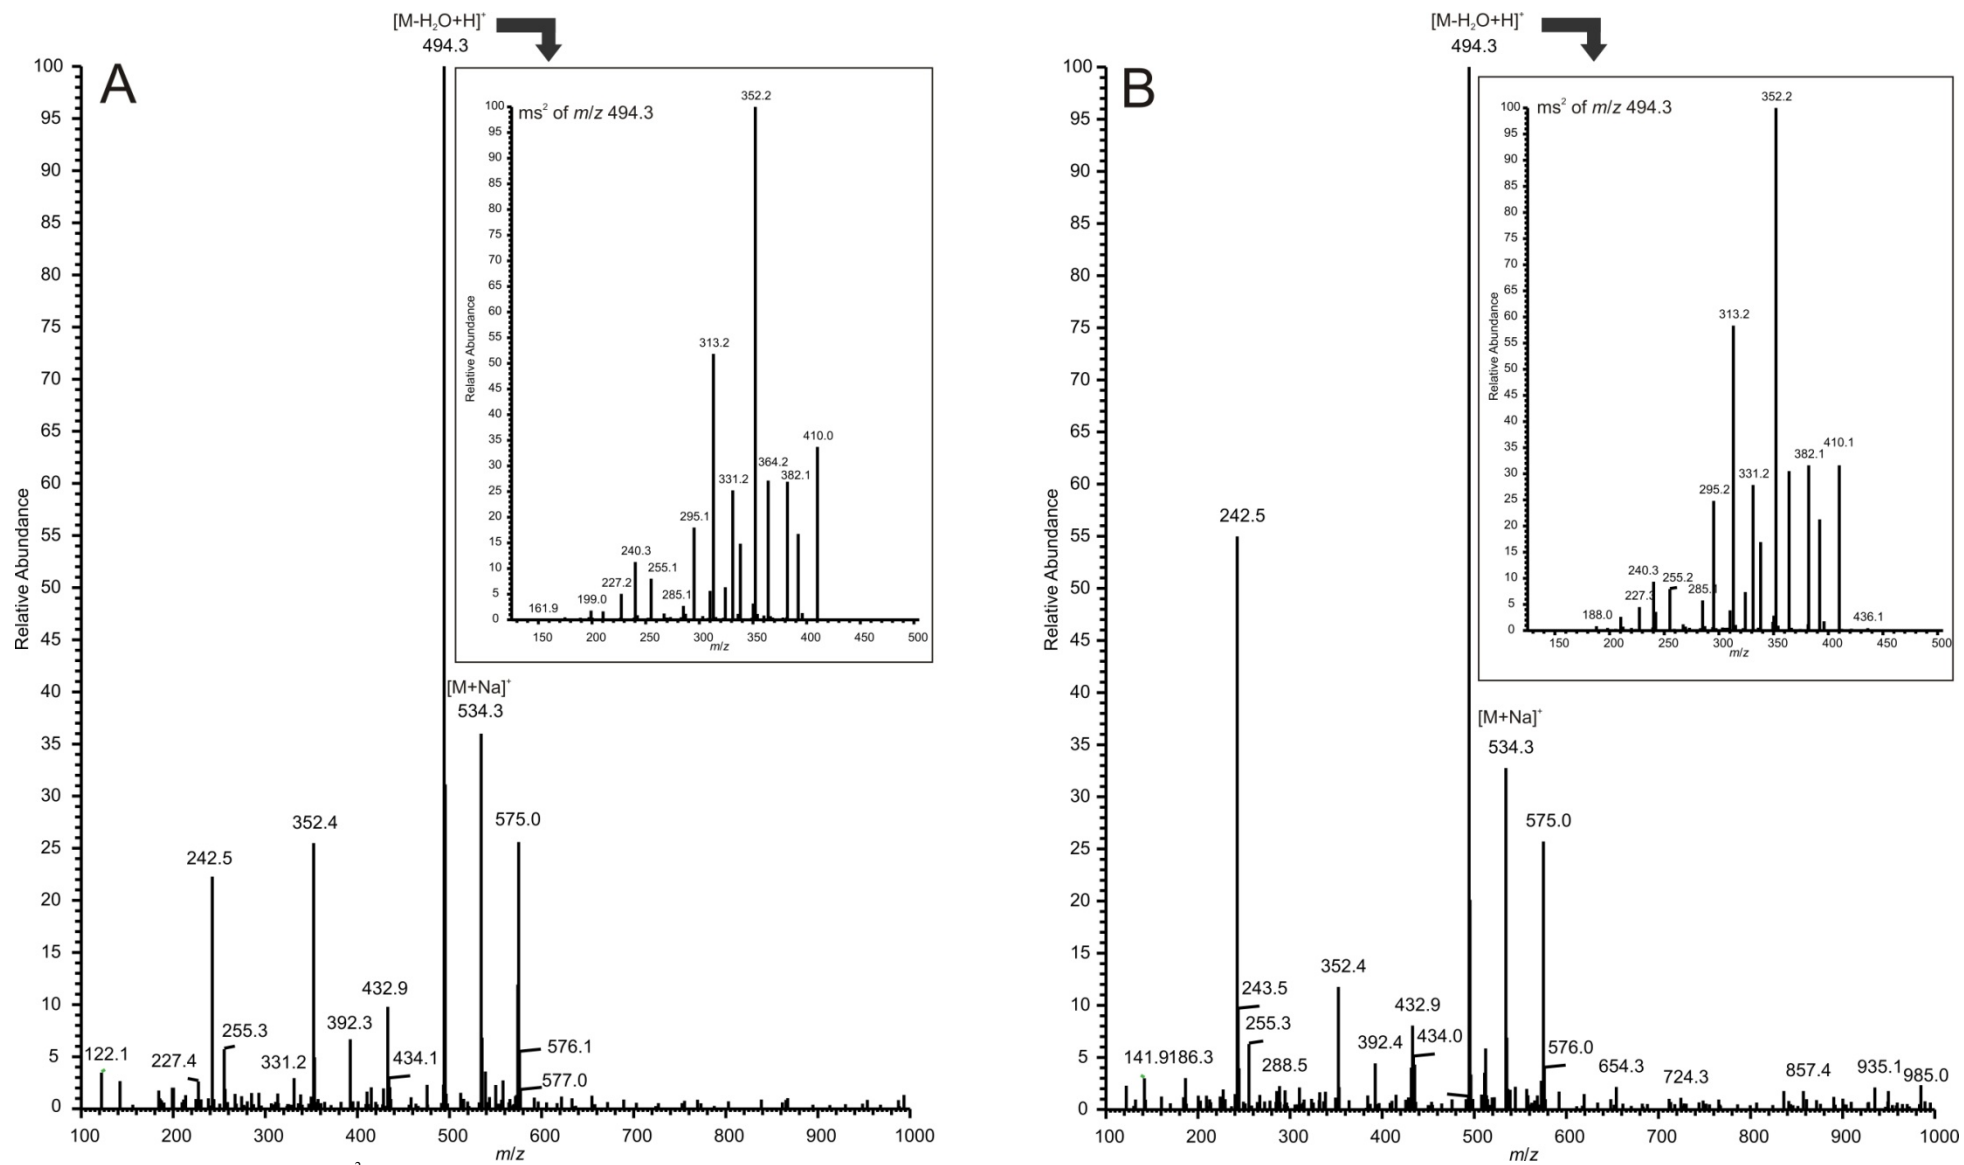

**Figure S2:** positive ESI MS and the  $ms^2$  spectrum of  $m/z$  494.3 obtained from the enzymatic product with a retention time of 12.5 min (A) and verruculogen standard (B).

## Reference List

- [1.] J. Sambrook, D. W. Russell, *Molecular cloning: a laboratory manual*, 3rd ed. Cold Spring Harbor Laboratory Press, New York **2001**.
- [2.] A. Grundmann, T. Kuznetsova, S. S. Afiyatullof, S.-M. Li, *Chembiochem* **2008**, 9, 2059-2063.
- [3.] M. M. Bradford, *Anal.Biochem.* **1976**, 72, 248-254.
- [4.] U. K. Laemmli, *Nature* **1970**, 227, 680-685.
- [5.] E. Eichhorn, J. R. vanderPloeg, M. A. Kertesz, T. Leisinger, *J.Biol.Chem.* **1997**, 272, 23031-23036.
